# Supplementary material
Source: HighWire-hosted journal article supplement (https://erj.ersjournals.com/content/55/2/1901378)
Supplement: inline-supplementary-material-1 [file inline-supplementary-material-1.pdf]

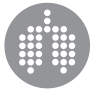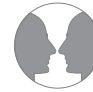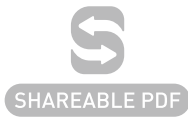

# Longitudinal changes in airway hyperresponsiveness and COPD mortality

Andreas A. Teferra <sup>1,2,3</sup>, Judith M. Vonk <sup>1,2</sup> and H. Marike Boezen<sup>1,2</sup>

**Affiliations:** <sup>1</sup>Department of Epidemiology, University of Groningen, University Medical Center Groningen, Groningen, The Netherlands. <sup>2</sup>Groningen Research Institute for Asthma and COPD (GRIAC), University of Groningen, University Medical Center Groningen, Groningen, The Netherlands. <sup>3</sup>Division of Epidemiology, College of Public Health, The Ohio State University, Columbus, OH, USA.

**Correspondence:** H. Marike Boezen, Department of Epidemiology, University of Groningen, University Medical Center Groningen, Hanzeplein 1, 9700 RB, Groningen, The Netherlands. E-mail: h.m.boezen@umcg.nl

@ERSpublications

**Airway hyperresponsiveness displayed on multiple occasions independently leads to a higher risk of COPD death** <http://bit.ly/363Wfkg>

**Cite this article as:** Teferra AA, Vonk JM, Boezen HM. Longitudinal changes in airway hyperresponsiveness and COPD mortality. *Eur Respir J* 2020; 55: 1901378 [<https://doi.org/10.1183/13993003.01378-2019>].

This single-page version can be shared freely online.

*To the Editor:*

Airway hyperresponsiveness (AHR) is associated with an increased mortality risk among males [1] and chronic obstructive pulmonary disease (COPD) patients [2]. However, this association is largely based on cross-sectional studies using a single measurement of AHR to predict mortality; inherently ignoring the longitudinal variability of AHR. AHR is variable regardless of disease or medication status, and is linked with changes in smoking habits, seasonal variations and exposure to pollutants [3–5]. Considering this, it remains unclear how changes in AHR affect mortality, specifically from causes such as COPD, cardiovascular disease (CVD) and cancer.
